# Supplementary figures and images for: Zn-doped In2O3 hollow spheres: mild solution reaction synthesis and enhanced Cl2 sensing performance
Source: Royal Society of Chemistry journal article supplement (doi:10.1039/c3ce42325e), 2014-01-01

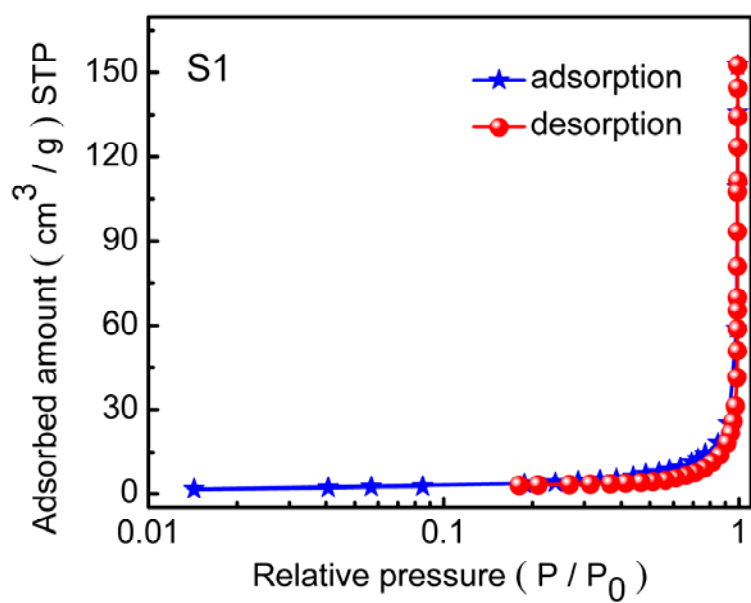

Fig. I(a)

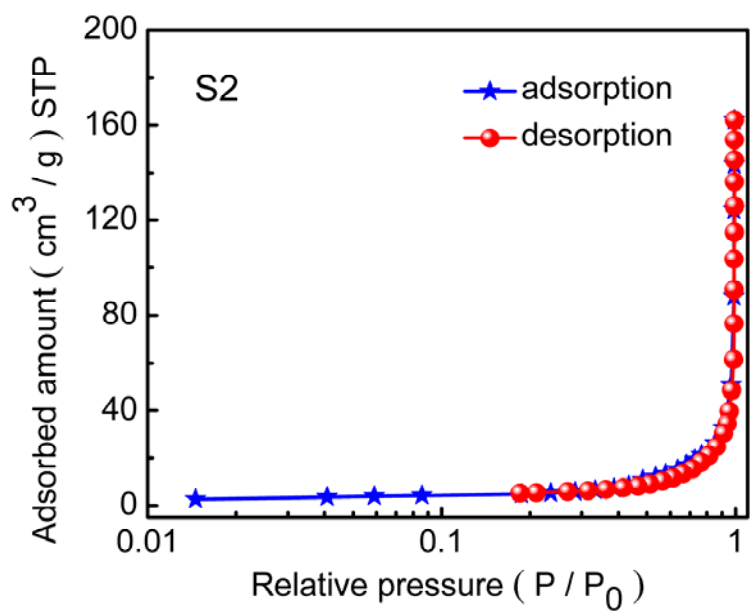

Fig. I(b)

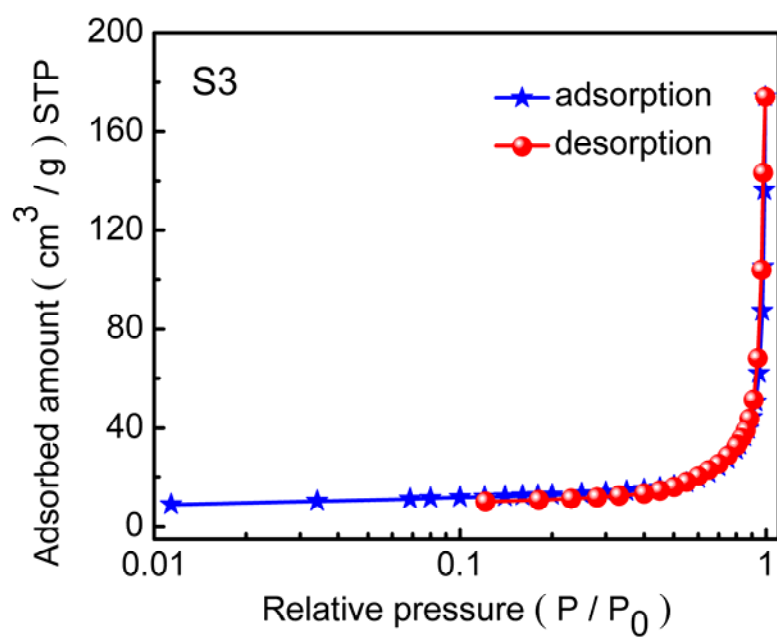

Fig. I(c)

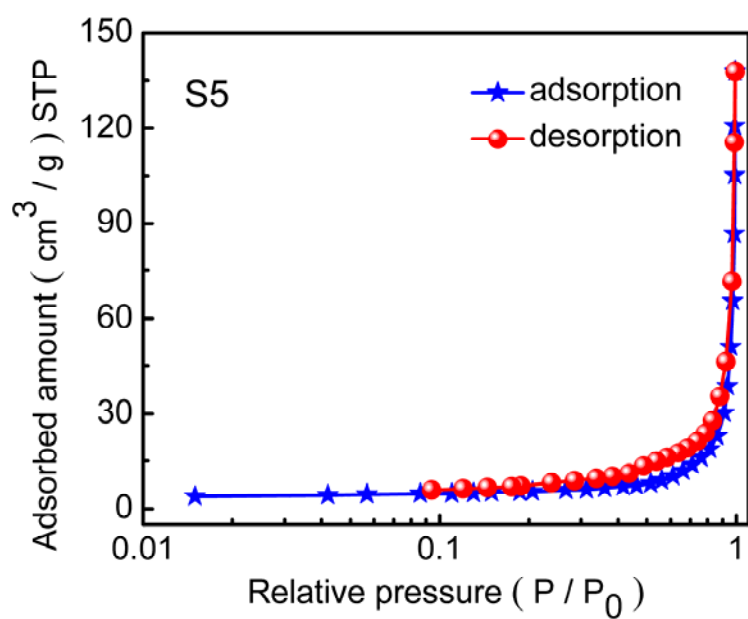

Fig. I(d)

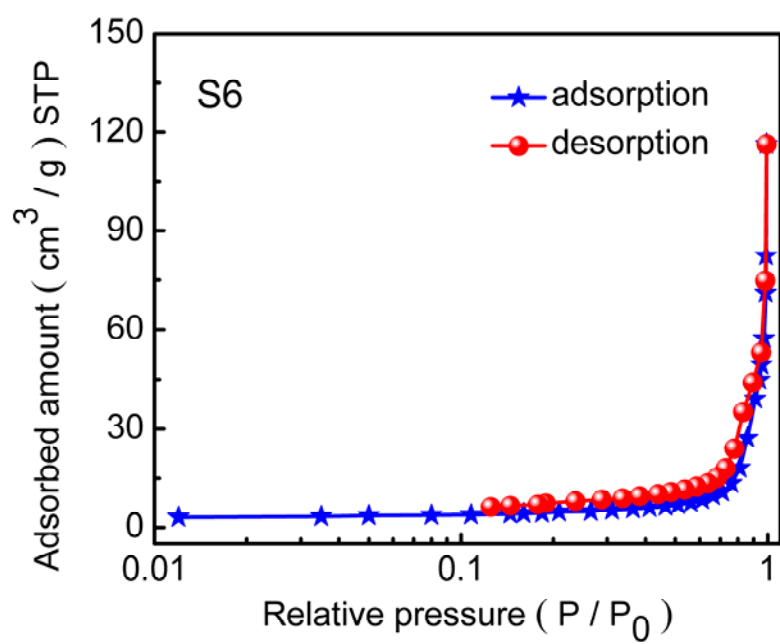

Fig. I(e)

Supplement: c3ce42325e.pdf [file c3ce42325e.pdf]
